# Supplementary material
Source: Springer Nature journal article supplement (https://www.springermedizin.de/resource/supplementary/12990_2007_87_MOESM2_ESM.pdf/9612542)

## A systemic

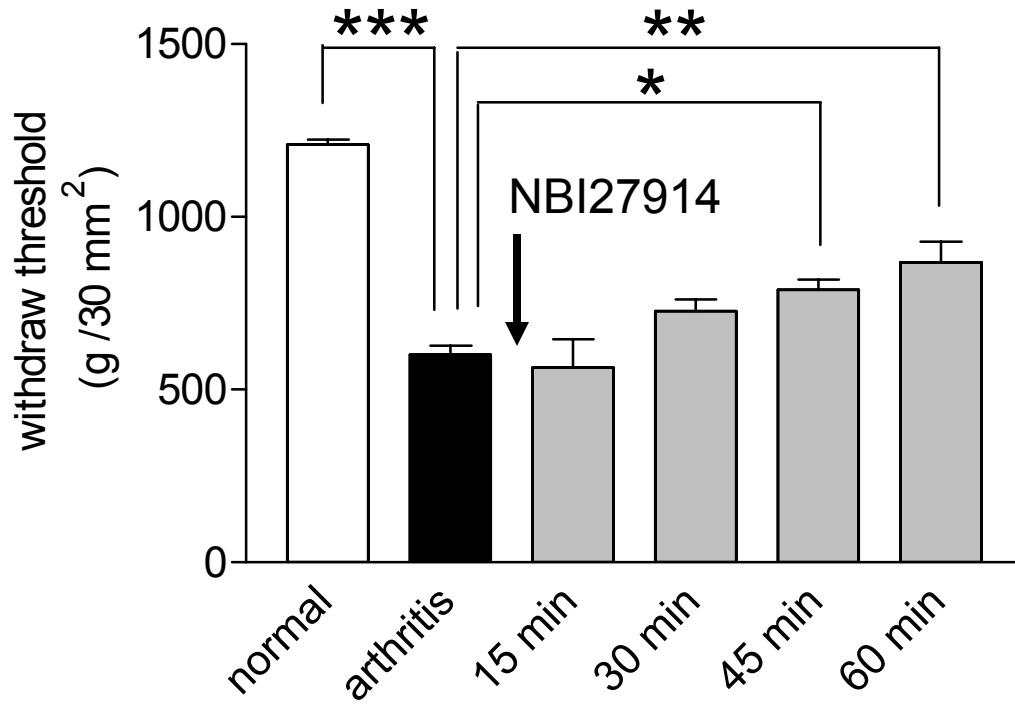

## B intra-CeA

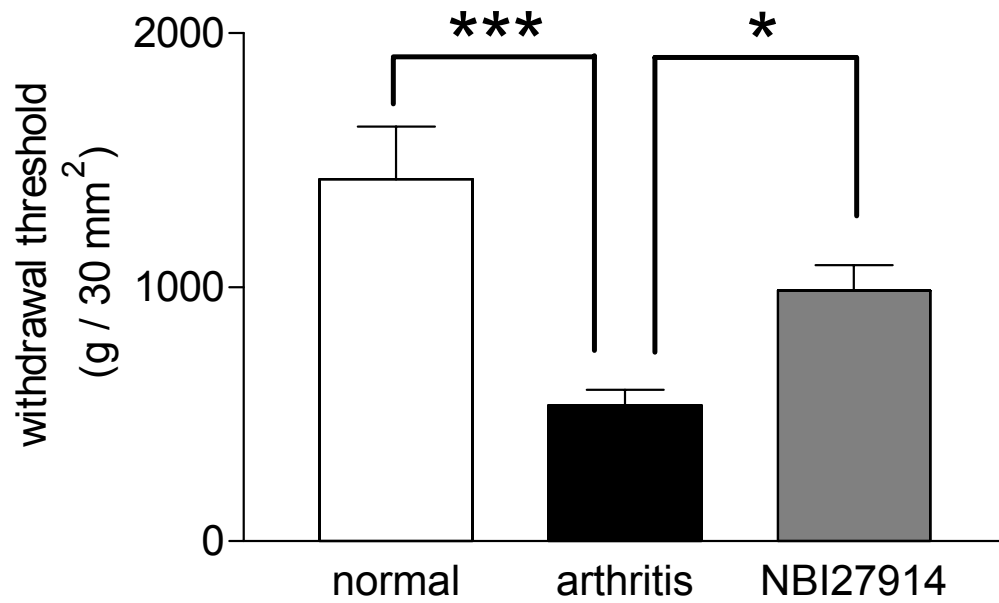

Supplement: MOESM2 [file 9612542]
